# Supplementary material for: A novel LIBS method for quantitative and high-throughput analysis of macro- and micronutrients in plants
Source: Royal Society of Chemistry journal article supplement (doi:10.1039/d4ja00105b), 2024-01-01
Supplement: d4ja00105b1.pdf [file d4ja00105b1.pdf]

## Supplementary information

### A novel LIBS method for quantitative and high-throughput analysis of macro- and micronutrients in plants

#### Journal of Analytical Atomic Spectrometry

Frederikke Neergaard Mikkelsen, Daniel Adén, Thomas Nikolajsen, Kristian Holst Laursen<sup>a</sup>

<sup>a</sup>Plant Nutrients and Food Quality Research Group, Plant and Soil Science Section, Department of Plant and Environmental Sciences, Faculty of Science, University of Copenhagen, Thorvaldsensvej 40, 1871 Frederiksberg C, Copenhagen, Denmark, [holst@plen.ku.dk](mailto:holst@plen.ku.dk)

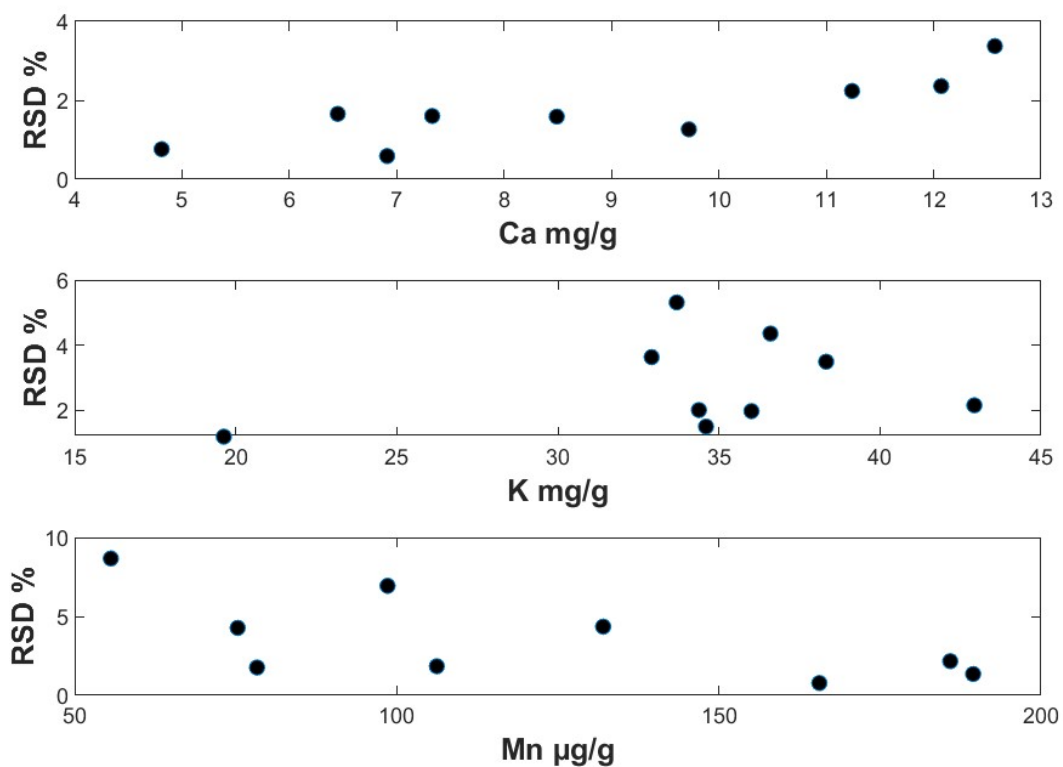

**Fig. 1** Baseline subtracted RSD for 9 wheat samples measured in triplicates based on peak height for the Ca 317.4 emission line, the K 404.4 emission line and the Mn 257.6 emission line.

**Table 1** Selected emission lines used in the prediction models. Column 1: the nutrient, column 2: the included emission lines, column 3: the ranges that are included in the models and column 4: the pre-processing (PP) method. Mean-centering (MC), multivariate scatter correction (MSC) or standard normal variate (SNV).

| <b>Nutrient</b> | <b>Emission lines (nm)</b> |       |       |       |       |       |       |       | <b>Range included in model (nm)</b>                                              | <b>PP</b>                                       |
|-----------------|----------------------------|-------|-------|-------|-------|-------|-------|-------|----------------------------------------------------------------------------------|-------------------------------------------------|
| Ca              | 184.0                      | 315.9 | 317.9 | 370.6 | 373.7 | 393.4 | 396.8 | 422.7 | 314.6-320<br>369-374.2<br>392-394.5<br>396.2-397.3<br>422.1-423.5<br>403.8-405.2 | MC                                              |
| K               | 404.5                      |       |       |       |       |       |       |       |                                                                                  | MC                                              |
| Mg              | 279.6                      | 280.2 | 285.2 |       |       |       |       |       | 278-281.6<br>284.6-186                                                           | MC                                              |
| P               | 213.6                      | 214.9 |       |       |       |       |       |       | 190-240                                                                          | SNV, MC                                         |
| S               | 180.7                      |       |       |       |       |       |       |       | 180-210                                                                          | MSC, MC<br>(mixed)<br>MC (faba<br>and<br>wheat) |
| Cu              | 324.7                      | 327.4 |       |       |       |       |       |       | 324.2-325<br>326.9-327.5                                                         | MC                                              |
| B               | 206.7                      | 208.9 |       |       |       |       |       |       | 206-207.2<br>208.7-209.2                                                         | MC                                              |
| Mn              | 257.6                      | 259.4 | 260.6 |       |       |       |       |       | 257-261.5                                                                        | MC                                              |
| Fe              | 238.2                      | 259.9 | 274.7 |       |       |       |       |       | 237.8-239<br>258.9-260.3<br>273.7-276.7                                          | MSC, MC                                         |
| Zn              | 202.6                      | 213.8 |       |       |       |       |       |       | 202-203<br>212.8-213                                                             | MC                                              |
